# Supplementary material for: Luminescence quenching of Re(i) molecular rectangles by quinones
Source: Royal Society of Chemistry journal article supplement (doi:10.1039/b925978c), 2010-01-01
Supplement: b925978c.pdf [file b925978c.pdf]

Supporting Information for

## Luminescence Quenching of Re(I) Molecular Rectangles by Quinones

Thangamuthu Rajendran,<sup>a,b</sup> Balasubramanian Manimaran,<sup>a</sup> Rong-Tang Liao,<sup>a</sup>  
Yen-Hsiang Liu,<sup>a</sup> Pounraj Thanasekaran,<sup>a</sup> Ren-Jay Lin,<sup>d</sup> I-Jy Chang,<sup>d</sup> Pi-Tai  
Chou,<sup>e</sup> Ramasamy Ramaraj,<sup>c</sup> Seenivasan Rajagopal<sup>c,\*</sup> and Kuang-Lieh Lu<sup>a,\*</sup>

<sup>a</sup> *Institute of Chemistry, Academia Sinica, Taipei 115, Taiwan*

<sup>b</sup> *Vivekananda college, Tiruvedakam West, Madurai-625217, India*

<sup>c</sup> *School of Chemistry, Madurai Kamaraj University, Madurai-625021, India*

<sup>d</sup> *Department of Chemistry, National Taiwan Normal University, Taipei 117, Taiwan*

<sup>e</sup> *Department of Chemistry, National Taiwan University, Taipei 107, Taiwan*

### Contents

**Figure S1.** Molecular models for rectangles **I–III**.<sup>S1</sup>

**Figure S2.** UV-vis spectrum changes upon the incremental addition of TCNQ to complex **III** in CH<sub>2</sub>Cl<sub>2</sub>. Concentration of TCNQ: (a) 0 M, (b) 4 × 10<sup>-6</sup> M, (c) 8 × 10<sup>-6</sup> M, (d) 12 × 10<sup>-6</sup> M, (e) 16 × 10<sup>-6</sup> M, (f) 20 × 10<sup>-6</sup> M, (g) 24 × 10<sup>-6</sup> M and (h) 28 × 10<sup>-6</sup> M.

**Figure S3.** Cyclic voltamogram of TCNQ with **III** in CH<sub>2</sub>Cl<sub>2</sub> containing 0.1 mol dm<sup>-3</sup> [NBu<sub>4</sub>][ClO<sub>4</sub>].

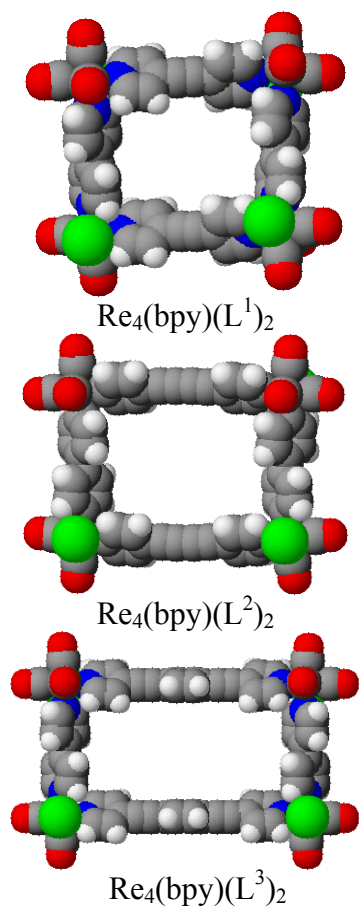

**Figure S1.** Molecular models for rectangles I–III.<sup>s1</sup>

MM2 simulation:

| X              | Re–X–Re (Å) | Re–bpy–Re (Å) |
|----------------|-------------|---------------|
| L <sup>1</sup> | 14.0        | 11.4          |
| L <sup>2</sup> | 16.6        | 11.4          |
| L <sup>3</sup> | 20.8        | 11.4          |

bpy: 4,4'-bipyridine

L<sup>1</sup>: 4,4'-dipyridylacetylene (dpa)

L<sup>2</sup>: 4,4'-dipyridylbutadiyne (dpb)

L<sup>3</sup>: 1,4-bis(4'-pyridylethynyl)benzene (bpeb)

Reference:

s1. T. Rajendran, B. Manimaran, R. T. Liao, R. J. Lin, P. Thanasekaran, G. H. Lee, S. M. Peng, Y. H. Liu, I. J. Chang, S. Rajagopal and K. L. Lu, *Inorg. Chem.*, 2003, **42**, 6388.

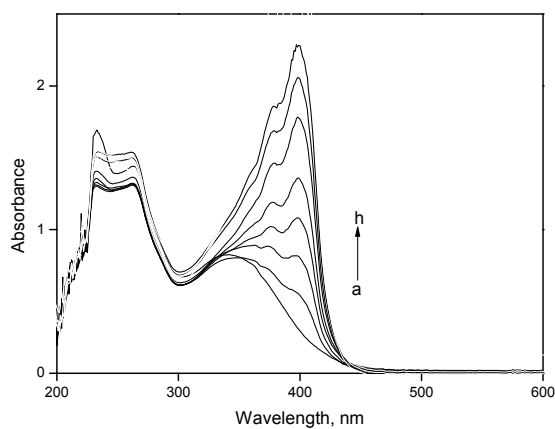

**Figure S2.** UV-vis spectrum changes upon the incremental addition of TCNQ to complex **III** in  $\text{CH}_2\text{Cl}_2$ . Concentration of TCNQ: (a) 0 M, (b)  $4 \times 10^{-6}$  M, (c)  $8 \times 10^{-6}$  M, (d)  $12 \times 10^{-6}$  M, (e)  $16 \times 10^{-6}$  M, (f)  $20 \times 10^{-6}$  M, (g)  $24 \times 10^{-6}$  M and (h)  $28 \times 10^{-6}$  M.

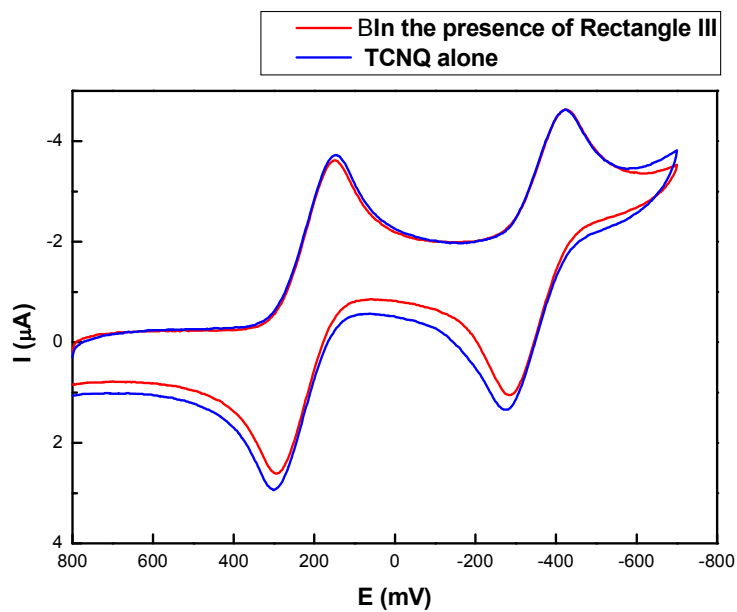

**Figure S3.** Cyclic voltammogram of TCNQ with **III** in  $\text{CH}_2\text{Cl}_2$  containing  $0.1 \text{ mol dm}^{-3} [\text{NBu}_4][\text{ClO}_4]$ .
